# Supplementary material
Source: PubMed Central journal article supplement (PMC6066348)
Supplement: EHP1480.s001.acco.pdf [file EHP1480.s001.acco.pdf]

**Note to readers with disabilities:** *EHP* strives to ensure that all journal content is accessible to all readers. However, some figures and Supplemental Material published in *EHP* articles may not conform to [508 standards](#) due to the complexity of the information being presented. If you need assistance accessing journal content, please contact [ehp508@niehs.nih.gov](mailto:ehp508@niehs.nih.gov). Our staff will work with you to assess and meet your accessibility needs within 3 working days.

### **Supplemental Material**

#### **Associations between Personal Care Product Use Patterns and Breast Cancer Risk among White and Black Women in the Sister Study**

Kyla W. Taylor, Melissa A. Troester, Amy H. Herring, Lawrence S. Engel, Hazel B. Nichols, Dale P. Sandler, and Donna D. Baird

#### **Table of Contents**

**Table S1:** Full list of products assessed in questionnaire for each personal care product type (beauty, hair, and skin) with those remaining in analysis noted.

**Table S2:** Hazard ratios (HRs) and 95% confidence intervals (CIs) for the association between latent classes and breast cancer risk by ER status among post-menopausal white women.

**Table S3:** Hazard ratios (HRs) and 95% confidence intervals (CIs) for the association between latent classes and breast cancer risk, stratified by in situ or invasive events, among post-menopausal women white women.

**Figure S1:** Item-response probability conditional on class membership.

Table S1. Full list of products assessed in questionnaire for each personal care product type (beauty, hair, and skin) with those remaining in analysis noted.

---

| <b>Beauty (14)</b>          | <b>Hair (15)</b>               | <b>Skin (19)</b>              |
|-----------------------------|--------------------------------|-------------------------------|
| Mascara <sup>a</sup>        | Shampoo <sup>a</sup>           | Cleansing cream <sup>a</sup>  |
| Eyeshadow <sup>a</sup>      | Conditioner <sup>a</sup>       | Face cream                    |
| Eyeliner <sup>a</sup>       | Hair spray <sup>a</sup>        | Face mask                     |
| Lip moisturizer             | Hair gel <sup>a</sup>          | Shaving cream                 |
| Lip stick <sup>a</sup>      | Pomade <sup>a</sup>            | Anti-aging cream <sup>a</sup> |
| Foundation <sup>a</sup>     | Hair dye-permanent             | Age spot remover              |
| Blush <sup>a</sup>          | Hair dye-semi permanent        | Self-tanner                   |
| Makeup remover <sup>a</sup> | Hair highlighter               | Baby oil                      |
| Nail polish <sup>a</sup>    | Hair straightener <sup>a</sup> | Petroleum Jelly <sup>a</sup>  |
| Nail polish remover         | Hair color rinse               | Body lotion <sup>a</sup>      |
| Artificial nails            | Hair food                      | Hand lotion <sup>a</sup>      |
| Artificial nails (other)    | Hair bleach                    | Foot cream <sup>a</sup>       |
| Perfume <sup>a</sup>        | Hair perm                      | Deodorant                     |
| Cuticle cream               | Rogaine                        | Talcum underarms <sup>a</sup> |
|                             | Hair straightener (other)      | Talcum other <sup>a</sup>     |
|                             |                                | Talcum vaginal                |
|                             |                                | Bath gel                      |
|                             |                                | Skin lightener                |
|                             |                                | Blemish cream                 |

<sup>a</sup>Personal care products used in latent class analyses

Table S2. Hazard ratios (HRs) and 95% confidence intervals (CIs) for the association between latent classes and breast cancer risk by ER status among post-menopausal white women

| <b>Beauty Classes</b>                                                    | <b>Person-years</b> | <b>Post-menopausal BC Events</b> | <b>adjHR (95% CI)<sup>a</sup></b> | <b>ER+ Events<sup>b</sup></b> | <b>adjHR (95% CI)<sup>a</sup></b> | <b>ER- Events<sup>b</sup></b> | <b>adjHR (95% CI)<sup>a</sup></b> |
|--------------------------------------------------------------------------|---------------------|----------------------------------|-----------------------------------|-------------------------------|-----------------------------------|-------------------------------|-----------------------------------|
| Infrequent user                                                          | 53247               | 372                              | 1                                 | 282                           | 1                                 | 41                            | 1                                 |
| Moderate user                                                            | 84289               | 631                              | 1.16 (1.12, 1.19)                 | 446                           | 1.05 (0.90, 1.23)                 | 74                            | 1.03 (0.69, 1.54)                 |
| Frequent user                                                            | 90181               | 656                              | 1.18 (1.14, 1.21)                 | 505                           | 1.10 (0.94, 1.28)                 | 57                            | 0.72 (0.47, 1.10)                 |
| Totals <sup>c</sup>                                                      | 227717              | 1659                             |                                   | 1248                          |                                   | 172                           |                                   |
| <b>Hair Classes</b>                                                      |                     |                                  |                                   |                               |                                   |                               |                                   |
| Infrequent users of hair spray                                           | 115014              | 841                              | 1                                 | 617                           | 1                                 | 89                            | 1                                 |
| Moderate users of pomade, hair straightener, hair spray, and conditioner | 7190                | 56                               | 0.76 (0.71, 0.81)                 | 43                            | 0.90 (0.65, 1.25)                 | 5                             | 0.98 (0.39, 2.44)                 |
| Frequent users of hair spray and hair gel                                | 103825              | 757                              | 1.03 (1.01, 1.06)                 | 571                           | 0.84 (0.75, 0.94)                 | 77                            | 0.86 (0.63, 1.18)                 |
| Totals <sup>c</sup>                                                      | 226029              | 1654                             |                                   | 1248                          |                                   | 172                           |                                   |
| <b>Skincare Classes</b>                                                  |                     |                                  |                                   |                               |                                   |                               |                                   |
| Infrequent user                                                          | 43793               | 324                              | 1                                 | 239                           | 1                                 | 34                            | 1                                 |
| Moderate user                                                            | 101807              | 721                              | 1.08 (1.05, 1.12)                 | 537                           | 1.09 (0.93, 1.28)                 | 68                            | 0.85 (0.56, 1.30)                 |
| Frequent user                                                            | 52621               | 420                              | 1.12 (1.09, 1.16)                 | 311                           | 1.07 (0.90, 1.28)                 | 52                            | 1.07 (0.68, 1.67)                 |
| Talcum powder user                                                       | 29453               | 195                              | 1.03 (0.99, 1.07)                 | 148                           | 1.00 (0.81, 1.24)                 | 17                            | 0.80 (0.44, 1.44)                 |
| Totals <sup>c</sup>                                                      | 227674              | 1660                             |                                   | 1248                          |                                   | 172                           |                                   |

<sup>a</sup> adjusted for age, parity, age at first live birth, duration of breastfeeding, adult BMI, alcohol use, oral contraceptive use, post-menopausal hormone therapy use, education

<sup>b</sup> ER status was available for 85% (N=1,420) of white women with a post-menopausal diagnosis of breast cancer

<sup>c</sup> Total numbers of BC events and person-years are for women with complete data for each product class; after accounting for missing data, total numbers of person-years for white women with a post-menopausal diagnosis of breast cancer were 230,023 and total number of BC Events were 1,679; did not report results if <20 BC events

Abbreviations: BC, breast cancer; +, positive; -, negative; 95% CI, 95% confidence interval; BMI, body mass index; ER, estrogen receptor; HR, hazard ratio

Table S3. Hazard ratios (HRs) and 95% confidence intervals (CIs) for the association between latent classes and breast cancer risk, stratified by in situ or invasive events, among post-menopausal women white women

| <b>Beauty Classes</b>                                                    | <b>Person-years</b> | <b>Post-menopausal BC Events<sup>a</sup></b> | <b>adjHR (95% CI)<sup>b</sup></b> | <b>In situ events<sup>c</sup></b> | <b>adjHR (95% CI)<sup>b</sup></b> | <b>Invasive events<sup>c</sup></b> | <b>adjHR (95% CI)<sup>b</sup></b> |
|--------------------------------------------------------------------------|---------------------|----------------------------------------------|-----------------------------------|-----------------------------------|-----------------------------------|------------------------------------|-----------------------------------|
| Infrequent user                                                          | 53247               | 372                                          | 1                                 | 62                                | 1                                 | 266                                | 1                                 |
| Moderate user                                                            | 84289               | 631                                          | 1.16 (1.12, 1.19)                 | 132                               | 1.41 (1.06, 1.89)                 | 396                                | 1.09 (0.94, 1.27)                 |
| Frequent user                                                            | 90181               | 656                                          | 1.18 (1.14, 1.21)                 | 132                               | 1.38 (1.03, 1.85)                 | 429                                | 1.13 (0.97, 1.32)                 |
| Totals                                                                   | 227717              | 1659                                         |                                   | 326                               |                                   | 1091                               |                                   |
| <b>Hair Classes</b>                                                      |                     |                                              |                                   |                                   |                                   |                                    |                                   |
| Infrequent users of hair spray                                           | 115014              | 841                                          | 1                                 | 163                               | 1                                 | 545                                | 1                                 |
| Moderate users of pomade, hair straightener, hair spray, and conditioner | 7190                | 56                                           | 0.76 (0.71, 0.81)                 | 9                                 | 0.73 (0.37, 1.43)                 | 43                                 | 0.94 (0.69, 1.29)                 |
| Frequent users of hair spray and hair gel                                | 103825              | 757                                          | 1.03 (1.01, 1.06)                 | 153                               | 1.07 (0.87, 1.31)                 | 499                                | 1.01 (0.90, 1.13)                 |
| Totals                                                                   | 226029              | 1654                                         |                                   | 325                               |                                   | 1087                               |                                   |
| <b>Skincare Classes</b>                                                  |                     |                                              |                                   |                                   |                                   |                                    |                                   |
| Infrequent user                                                          | 43793               | 324                                          | 1                                 | 52                                | 1                                 | 226                                | 1                                 |
| Moderate user                                                            | 101807              | 721                                          | 1.08 (1.05, 1.12)                 | 155                               | 1.30 (0.97, 1.76)                 | 456                                | 0.97 (0.83, 1.13)                 |
| Frequent user                                                            | 52621               | 420                                          | 1.12 (1.09, 1.16)                 | 87                                | 1.38 (1.00, 1.92)                 | 275                                | 1.11 (0.94, 1.31)                 |
| Talcum powder user                                                       | 29453               | 195                                          | 1.03 (0.99, 1.07)                 | 32                                | 0.94 (0.62, 1.42)                 | 134                                | 0.95 (0.78, 1.17)                 |
| Totals                                                                   | 227674              | 1660                                         |                                   | 326                               |                                   | 1091                               |                                   |

<sup>a</sup> Total numbers of BC events and person-years are for women with complete data for each product class only; after accounting for missing data, total numbers of person-years for white women with a post-menopausal diagnosis of breast cancer were 230,023 and total number of BC Events were 1,679

<sup>b</sup> adjusted for age, parity, age at first live birth, duration of breastfeeding, adult BMI, alcohol use, oral contraceptive use, post-menopausal hormone therapy use, education

<sup>c</sup> Breast cancer subtype (invasive or in situ) was available for 84% (N=1,417) of white women with a post- menopausal diagnosis of breast cancer

Abbreviations: BC, breast cancer +, positive; -, negative; 95% CI, 95% confidence interval; BMI, body mass index; ER, estrogen receptor; HR, hazard ratio

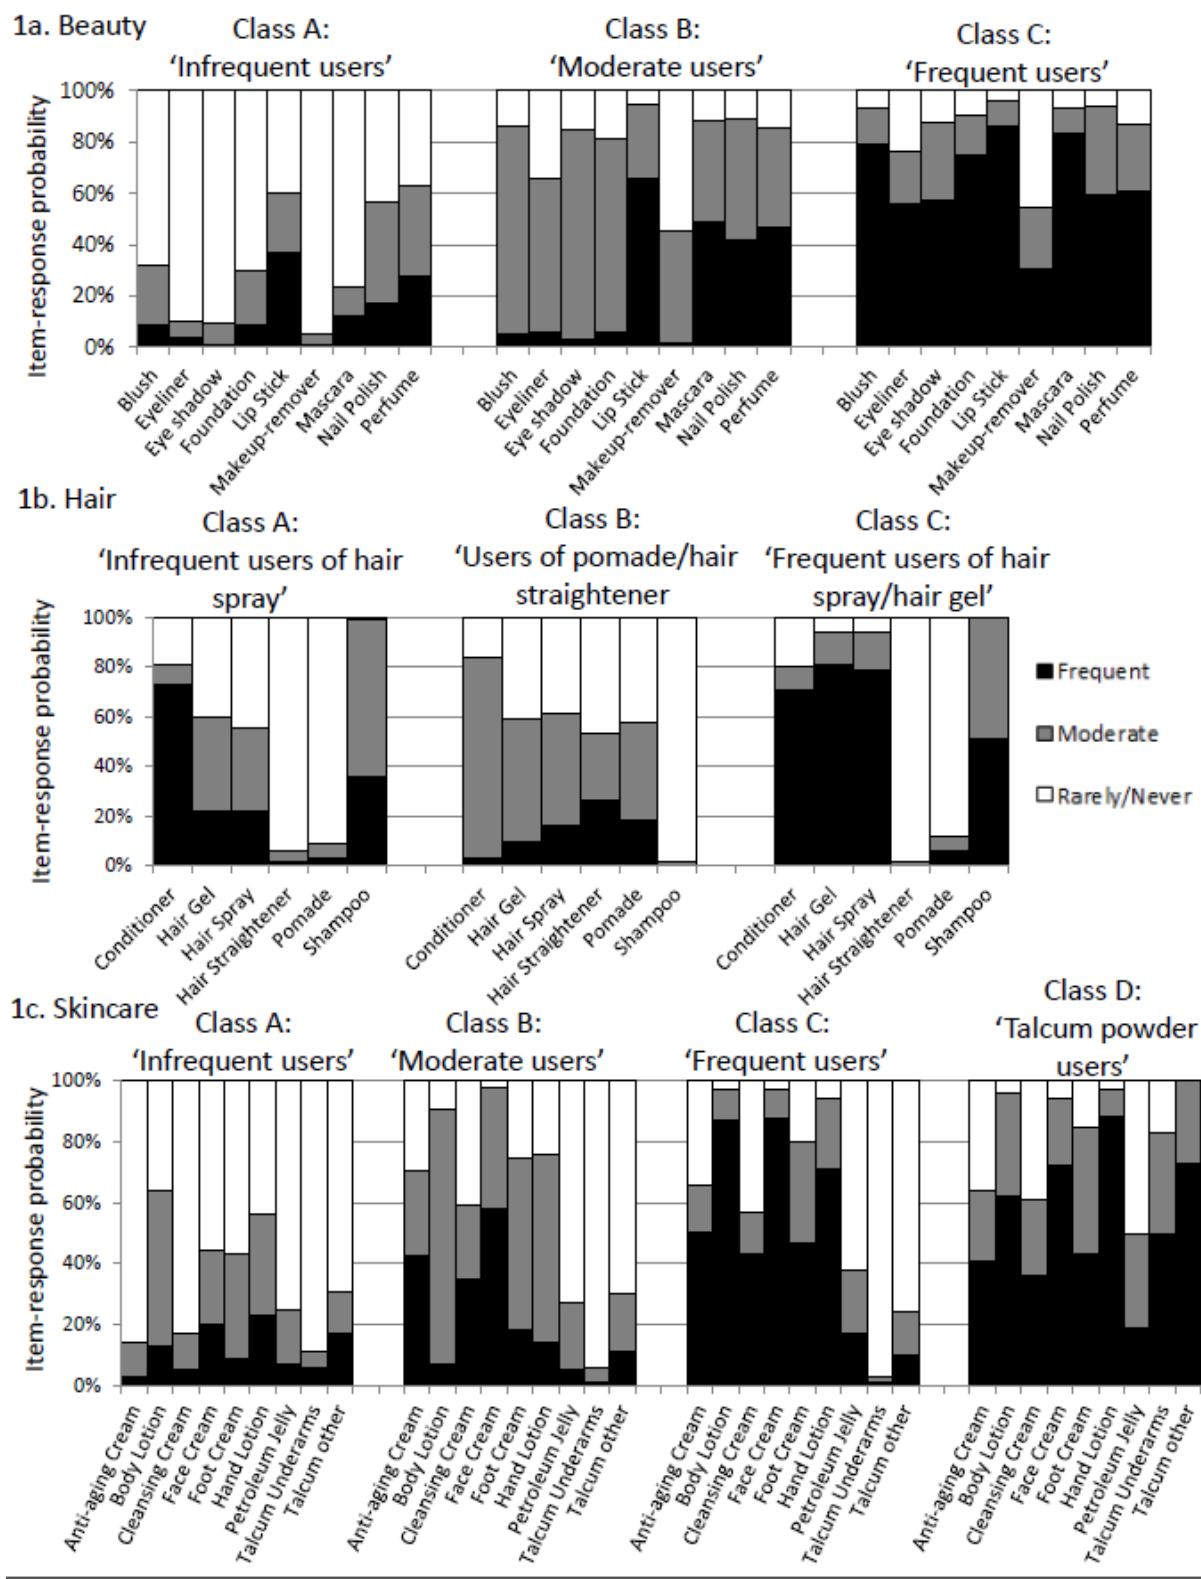

Figure S1. Item-response probability conditional on class membership
